# Supplementary material
Source: Springer Nature journal article supplement (https://www.springermedizin.de/resource/supplementary/13099_2010_39_MOESM3_ESM.pdf/9665382)

| Study name     | Country  | Odds ratio  | Lower limit | Upper limit | Weight |
|----------------|----------|-------------|-------------|-------------|--------|
| Lu             | Japan    | 2.16        | 0.78        | 5.98        | 3.70   |
| Lu             | Korea    | 2.80        | 0.50        | 15.73       | 1.29   |
| Argent         | China    | 2.00        | 0.22        | 18.33       | 0.78   |
| Douraghi       | Iran     | 0.64        | 0.25        | 1.68        | 4.14   |
| Zhang          | China    | 0.49        | 0.23        | 1.05        | 6.64   |
| Nguyen         | Japan    | 0.97        | 0.46        | 2.04        | 6.93   |
| Hussein        | Iraq     | 3.20        | 0.42        | 24.42       | 0.93   |
| Yeh            | Taiwan   | 0.73        | 0.27        | 2.00        | 3.78   |
| <b>Asia</b>    |          | <b>0.93</b> | <b>0.64</b> | <b>1.34</b> |        |
| Lu             | Colombia | 1.11        | 0.42        | 2.93        | 4.07   |
| Argent         | USA      | 2.44        | 0.19        | 31.53       | 0.59   |
| Pacheco        | Brazil   | 0.86        | 0.28        | 2.58        | 3.15   |
| <b>Western</b> |          | <b>1.06</b> | <b>0.53</b> | <b>2.14</b> |        |
| <b>Overall</b> |          | <b>0.95</b> | <b>0.69</b> | <b>1.32</b> |        |

ORs and 95% CI

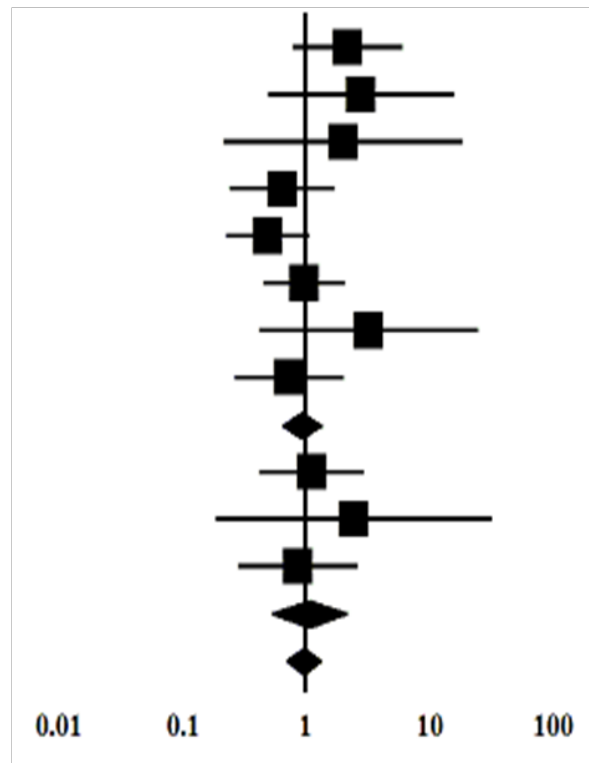

Supplement: MOESM3 [file 9665382]
